# Supplementary material
Source: PubMed Central journal article supplement (PMC4241383)
Supplement: NIHMS618529-supplement-02.pdf [file NIHMS618529-supplement-02.pdf]

Supplemental Table 1. *Contrasts of interest for regions significant in MDD by Gender by Age Interaction.*

| <i>Variable</i>                                                      | <i>F</i> | <i>df</i> | <i>p</i> | <i>Contrast</i> | <i>t</i> | <i>df</i> | <i>p</i> |
|----------------------------------------------------------------------|----------|-----------|----------|-----------------|----------|-----------|----------|
| <u><i>12a. Inferior Frontal Gyrus (38 26 -6, BA 47)</i></u>          |          |           |          |                 |          |           |          |
| MDD Status by Gender, Younger                                        | 4.06     | 1, 50     | .049     | DWY = CWY       | .56      | 28        | .583     |
|                                                                      |          |           |          | DMY < CMY       | -3.16    | 22        | .005     |
|                                                                      |          |           |          | DWO < CWO       | -2.90    | 12.56     | .013     |
| MDD Status by Gender, Older                                          | 10.40    | 1, 42     | .002     | DMO ≥ CMO       | 1.85     | 22        | .079     |
| <u><i>12b. Inferior/Middle Frontal Gyrus (45 12 29, BA 9)</i></u>    |          |           |          |                 |          |           |          |
| MDD Status by Gender, Younger                                        | 6.03     | 1, 50     | .018     | DWY > CWY       | 2.41     | 28        | .023     |
|                                                                      |          |           |          | DMY = CMY       | -1.24    | 22        | .230     |
|                                                                      |          |           |          | DWO ≤ CWO       | -1.75    | 20        | .096     |
| MDD Status by Gender, Older                                          | 6.04     | 1, 42     | .018     | DMO ≥ CMO       | 1.85     | 22        | .078     |
| <u><i>12c. Inferior Frontal Gyrus/Putamen (36 10 -7, BA 13)</i></u>  |          |           |          |                 |          |           |          |
| MDD Status by Gender, Younger                                        | 10.97    | 1, 50     | .002     | DWY = CWY       | 1.46     | 14.67     | .165     |
|                                                                      |          |           |          | DMY < CMY       | -3.42    | 22        | .002     |
|                                                                      |          |           |          | DWO = CWO       | -1.72    | 20        | .101     |
| MDD Status by Gender, Older                                          | 9.51     | 1, 42     | .004     | DMO > CMO       | 3.21     | 22        | .004     |
| <u><i>12d. Middle Frontal Gyrus (24 16 36, BA 8)</i></u>             |          |           |          |                 |          |           |          |
| MDD Status by Gender, Younger                                        | 12.98    | 1, 50     | .001     | DWY > CWY       | 3.18     | 28        | .004     |
|                                                                      |          |           |          | DMY ≤ CMY       | -1.99    | 22        | .059     |
|                                                                      |          |           |          | DWO < CWO       | -3.52    | 20        | .002     |
| MDD Status by Gender, Older                                          | 10.21    | 1, 42     | .003     | DMO = CMO       | 1.36     | 22        | .189     |
| <u><i>12e. Middle Frontal Gyrus/Cingulate (-20 20 32, BA 32)</i></u> |          |           |          |                 |          |           |          |
| MDD Status by Gender, Younger                                        | 9.42     | 1, 50     | .003     | DWY > CWY       | 2.33     | 28        | .027     |
|                                                                      |          |           |          | DMY ≤ CMY       | -2.02    | 22        | .056     |
|                                                                      |          |           |          | DWO < CWO       | -4.01    | 20        | .001     |
| MDD Status by Gender, Older                                          | 8.73     | 1, 42     | .005     | DMO = CMO       | 1.38     | 22        | .182     |
| <u><i>12f. Superior Frontal Gyrus (20 39 35, BA 9)</i></u>           |          |           |          |                 |          |           |          |
| MDD Status by Gender, Younger                                        | 4.98     | 1, 50     | .030     | DWY = CWY       | 1.65     | 28        | .110     |
|                                                                      |          |           |          | DMY = CMY       | -1.64    | 22        | .115     |
|                                                                      |          |           |          | DWO < CWO       | -2.27    | 20        | .034     |
| MDD by Gender, Older                                                 | 9.93     | 1, 42     | .003     | DMO > CMO       | 2.34     | 22        | .029     |
| <u><i>12g. Cingulate (-4 -11 22, BA 23)</i></u>                      |          |           |          |                 |          |           |          |
| MDD Status by Gender, Younger                                        | 13.21    | 1, 50     | .001     | DWY > CWY       | 2.40     | 28        | .023     |
|                                                                      |          |           |          | DMY < CMY       | -2.64    | 22        | .015     |
|                                                                      |          |           |          | DWO < CWO       | -3.55    | 20        | .002     |
| MDD Status by Gender, Older                                          | 6.92     | 1, 42     | .012     | DMO = CMO       | 0.57     | 22        | .573     |

*Note.* Y = Younger, O = Older, W = Women, M = Men, D = Major Depressive Disorder, C = Healthy Comparison
